# Supplementary material for: Rediscovery of Remarkably Rare Anaerobic Tentaculiferous Ciliate Genera Legendrea and Dactylochlamys (Ciliophora: Litostomatea)
Source: MDPI journal article supplement (doi:10.3390/biology12050707), 2023-05-12
Supplement: s1 [file s1]

**Supplementary Table 1.** Morphometric data *Dactylochlamys pisciformis* (VB2A)

| Character                         | Method <sup>b</sup> | Mean | M    | SD   | CV   | Min  | Max  | <i>n</i> |
|-----------------------------------|---------------------|------|------|------|------|------|------|----------|
| Body, length <sup>a</sup>         | P                   | 60.0 | 59.2 | 8.27 | 13.8 | 49.5 | 76.1 | 9        |
| Body, width                       | P                   | 17.9 | 16.2 | 4.90 | 17.6 | 12.3 | 26.4 | 9        |
| Body, length-width,<br>ratio      | P                   | 3.6  | 3.7  | 1.01 | 11.4 | 2.0  | 5.8  | 9        |
| Oral bulge, length                | P                   | 4.2  | 4.1  | 0.58 | 13.9 | 3.4  | 5.4  | 9        |
| Macronucleus, length <sup>c</sup> | P                   | 8.1  | 8.0  | 2.27 | 27.9 | 5.5  | 12.5 | 8        |
| Macronucleus, width               | P                   | 6.4  | 5.7  | 1.41 | 22.1 | 4.8  | 8.5  | 8        |
| Micronucleus,<br>number           | P                   | 1.0  | 1.0  | –    | –    | 1    | 1    | 5        |
| Micronucleus, length              | P                   | 2.7  | 2.8  | 0.36 | 13.2 | 2.1  | 3.1  | 5        |
| Micronucleus, width               | P                   | 2.1  | 2.1  | 0.20 | 9.8  | 1.9  | 2.3  | 2        |

<sup>a</sup>All distances in  $\mu\text{m}$ .

<sup>b</sup>All values from fixed protargol-impregnated permanent preparations.

<sup>c</sup>Measured end to end along long axis.

CV, coefficient of variation (%); M, median; Max, maximum value; Mean, arithmetic mean; Min, minimum value; *n*, number of cells studied except as noted; P, protargol; SD, standard deviation of the arithmetic mean.
