# Supplementary material for: Rediscovery of Remarkably Rare Anaerobic Tentaculiferous Ciliate Genera Legendrea and Dactylochlamys (Ciliophora: Litostomatea)
Source: MDPI journal article supplement (doi:10.3390/biology12050707), 2023-05-12
Supplement: s1 [file s1]

**Supplementary Table 3.** Morphometric data *Legendrea ornata* (GTUB)

| Character                                     | Method <sup>b</sup> | Mean | M    | SD    | CV   | Min  | Max  | <i>n</i>        |
|-----------------------------------------------|---------------------|------|------|-------|------|------|------|-----------------|
| Body, length <sup>a</sup>                     | P                   | 70.0 | 62.0 | 10.86 | 16.5 | 52.0 | 90.0 | 40              |
| Body, width                                   | P                   | 48.6 | 47.5 | 1.35  | 17.6 | 37.0 | 67.0 | 40              |
| Body, length-width, ratio                     | P                   | 1.37 | 1.36 | 0.15  | 11.4 | 1.06 | 1.7  | 40              |
| Oral bulge, length                            | P                   | 21.3 | 20.5 | 3.87  | 18.1 | 15.0 | 30.0 | 34              |
| Oral bulge, width                             | P                   | 3.5  | 3.0  | 0.61  | 17.5 | 3.0  | 5.0  | 17              |
| Macronucleus, length <sup>c</sup>             | P                   | 62.7 | 59.5 | 10.98 | 17.5 | 49.0 | 85.0 | 16              |
| Macronucleus, width                           | P                   | 4.2  | 4.1  | 0.51  | 12.3 | 3.6  | 5.4  | 16              |
| Micronucleus, number                          | P                   | 4.0  | 3.5  | 0.39  | 38.7 | 2.0  | 7.0  | 16              |
| Micronucleus, diameter                        | P                   | 2.4  | 2.5  | 0.32  | 13.5 | 1.5  | 2.5  | 18 <sup>d</sup> |
| Somatic kineties, number                      | P                   | 31.8 | 31.0 | 2.67  | 8.4  | 28   | 36   | 19              |
| Tentacles, number                             | P                   | 25.6 | 25.0 | 7.65  | 29.9 | 10   | 43   | 27              |
| Tentacle height, retracted                    | P                   | 4.9  | 5.0  | 0.09  | 17.5 | 3.0  | 8.0  | 99 <sup>e</sup> |
| Tentacle cap diameter                         | P                   | 3.8  | 4.0  | 0.71  | 19.0 | 2.5  | 6.0  | 95 <sup>f</sup> |
| Extrusome bundle length                       | P                   | 5.9  | 6.0  | 0.82  | 14.1 | 4.0  | 8.0  | 54 <sup>g</sup> |
| Dikinetids in circumtentacular kinety, number | P                   | 10.4 | 10.0 | 1.06  | 10.1 | 8    | 13   | 84 <sup>h</sup> |

---

<sup>a</sup>All distances in  $\mu\text{m}$ .

<sup>b</sup>All values from fixed protargol-impregnated permanent preparations. Measurements made using ocular micrometer.

<sup>c</sup>Measured end to end along long axis.

<sup>d</sup>18 micronuclei measured in seven cells

<sup>e</sup>Measured from 99 tentacles of 18 cells.

<sup>f</sup>Measured from 95 tentacles of 18 cells.

<sup>g</sup>Measured from 54 tentacles of 6 cells.

<sup>h</sup>Counted in 84 tentacles from 15 cells.

CV, coefficient of variation (%); M, median; Max, maximum value; Mean, arithmetic mean; Min, minimum value; *n*, number of cells studied except as noted; P, protargol; SD, standard deviation of the arithmetic mean.
