# Supplementary material for: Rediscovery of Remarkably Rare Anaerobic Tentaculiferous Ciliate Genera Legendrea and Dactylochlamys (Ciliophora: Litostomatea)
Source: MDPI journal article supplement (doi:10.3390/biology12050707), 2023-05-12
Supplement: s1 [file s1]

**Supplementary Table 4.** Illumina consensus sequences of putative prokaryotic symbionts

---

*Legendrea pespelicani* (VLKOV)  
Syntrophacae symbiont, partial 16S gene  
sequence

TACGGGGGGTGCAAGCGTTGTTGGAATC  
ATTGGGCGTAAAGAGCGTGTAGGCGGCTT  
AATAAGTCAGATGTGAAAGCCCTGGGCTTA  
ACCCAGGAAGGGCATTGAACTGTTAGG  
CTAGAGTAGGGGAGAGGAAGATGGAATTC  
CTGGTGTAGAGGTGAAATTCGTAGATATCA  
GGAAGAACACCAGTGGCGAAGGCGACCTT  
CTGGCCCTATACTGACGCTGAGATGCGAA  
AGCATGGGTAGCAAACAGG

*Legendrea pespelicani* (VLKOV)  
methanogenic symbiont, partial 16S gene  
sequence

CACCGGCAGCTCAAGTGGTGGCCGTTTTT  
ATTGGGCCTAAAGCGTTCGTAGCCGGCCT  
GATAAGTCTCTGGTGAAATCCCATAGCTTA  
ACTGTGGGAATTGCTGGAGATACTATCAGG  
CTTGAGGTCTGGGAGAGGTTAGGGGTACTC  
CCAGGGTAGGGGTGAAATCCTATAATCCT  
GGGAGGACCACCTGTGGCGAAGGCGCCT  
AACTGGAACGAACCTGACGGTGAGTAACG  
AAAGCCAGGGGCGCGAACC GG

*Dactylochlamys pisciformis* (VB2A)  
methanogenic symbiont, partial 16S gene  
sequence

TACCGGCTGCTCGAGTGATGGCCACTATTA  
CTGGGTTTAAAGCGTCCGTAGCTGGACTG  
TTAGGTCCCTTGGGAAATCTTCACGCTTAA  
CGTGAAGGCGTCTAAGAGATACCGGCAGT  
CTTGGGACTGGGAGAGGTAAACCGTACTT  
CGGGGGTAGGAGTGAAATCTTGTAATCCT  
CGAGGGACGACCTATGGCGAAGGCAGTTT  
ACCAGAACAGCTTCGACAGTGAGGGACGA  
AAGCTGGGGGAGCAAACGGG
