# Supplementary material for: Rediscovery of Remarkably Rare Anaerobic Tentaculiferous Ciliate Genera Legendrea and Dactylochlamys (Ciliophora: Litostomatea)
Source: MDPI journal article supplement (doi:10.3390/biology12050707), 2023-05-12
Supplement: s1 [file s1]

**Supplementary Table 2.** Morphometric data *Legendrea pespelicani* (VLKOV)

| Character                         | Method <sup>b</sup> | Mean  | M     | SD    | CV   | Min   | Max   | <i>n</i>        |
|-----------------------------------|---------------------|-------|-------|-------|------|-------|-------|-----------------|
| Body, length                      | P                   | 166.1 | 161.0 | 17.45 | 10.5 | 139.0 | 192.0 | 10              |
| Body, width                       | P                   | 120.9 | 123.5 | 18.02 | 14.9 | 90.0  | 145.0 | 10              |
| Body, length-width, ratio         | P                   | 1.4   | 1.4   | 0.22  | 15.4 | 1.1   | 1.8   | 10              |
| Oral bulge, length                | P                   | 78.9  | 84.0  | 17.76 | 22.5 | 53.0  | 112.0 | 10              |
| Oral bulge, width                 | P                   | 5.3   | 5.0   | 1.70  | 32.2 | 3.0   | 8.0   | 7               |
| Macronucleus, length <sup>c</sup> | P                   | 223.2 | 211.0 | 62.32 | 27.9 | 128.0 | 331.0 | 10              |
| Macronucleus, width               | P                   | 7.4   | 7.0   | 1.35  | 18.2 | 5.0   | 9.0   | 10              |
| Micronucleus, number              | P                   | 7.3   | 7.0   | 1.42  | 19.4 | 5     | 9     | 10              |
| Micronucleus, diameter            | P                   | 3.4   | 3.2   | 0.59  | 17.6 | 2.5   | 4.0   | 18 <sup>d</sup> |
| Somatic kineties, number          | P                   | 68.0  | 69.0  | 0.57  | 2.21 | 66.0  | 70.0  | 7               |
| Oral papillae, number             | P                   | 3.3   | 4.0   | 0.87  | 26.0 | 2     | 4     | 9               |
| Tentacles, number                 | P                   | 6.1   | 6.0   | 1.45  | 23.7 | 4     | 8     | 11              |
| Tentacle height                   | P                   | 8.0   | 8.0   | 2.84  | 35.2 | 4.0   | 15.0  | 17              |
| Tentacle cap diameter             | P                   | 10.5  | 10.0  | 1.84  | 17.5 | 8.0   | 15.0  | 65 <sup>d</sup> |
| Extrusome bundle length           | P                   | 25.2  | 25.0  | 2.20  | 8.73 | 22.0  | 28.0  | 10              |

|                                                     |   |      |      |      |      |      |      |                 |
|-----------------------------------------------------|---|------|------|------|------|------|------|-----------------|
| Dikinetids in<br>circumtentacular<br>kinety, number | P | 36.7 | 36.0 | 6.56 | 17.9 | 27.0 | 52.0 | 33 <sup>f</sup> |
|-----------------------------------------------------|---|------|------|------|------|------|------|-----------------|

---

<sup>a</sup>All distances in  $\mu\text{m}$ .

<sup>b</sup>All values from fixed protargol-impregnated permanent preparations. Measurements made using ocular micrometer.

<sup>c</sup>Measured end to end along long axis.

<sup>d</sup>Measured from 18 micronuclei of 10 cells

<sup>e</sup>Measured from 65 tentacles of 11 cells.

<sup>f</sup>Counts from 33 tentacles of six cells.

CV, coefficient of variation (%); M, median; Max, maximum value; Mean, arithmetic mean; Min, minimum value; *n*, number of cells studied except as noted; P, protargol; SD, standard deviation of the arithmetic mean.
