# Supplementary material for: Rediscovery of Remarkably Rare Anaerobic Tentaculiferous Ciliate Genera Legendrea and Dactylochlamys (Ciliophora: Litostomatea)
Source: MDPI journal article supplement (doi:10.3390/biology12050707), 2023-05-12
Supplement: s1 [file s1]

## LIST OF SUPPLEMENTARY VIDEO LINKS

Video S1: <https://youtu.be/nzrd-DETHFI>

*Dactylochlamys pisciformis* VB2A *in vivo*

Video S2: <https://youtu.be/DOYjwQjJBlo>

*Legendrea loyezae* MOKOTL *in vivo*

Video S3: <https://youtu.be/HHFZoBOU-Rg>

*Legendrea pespelicani* VLKOV *in vivo*

Video S4: <https://youtu.be/IVAoT3ZDx90>

*Legendrea pespelicani* VLKOV *in vivo*

Video S5: <https://youtu.be/KI5NQS93qQc>

*Legendrea pespelicani* VLKOV *in vivo*

Video S6: <https://youtu.be/MYpyCZ5oQdA>

*Legendrea ornata* SAGEGLEN *in vivo*

Video S7: <https://www.youtube.com/watch?v=uxjf6cp1yQU>

*Legendrea ornata*, gastrotrich prey capture and ingestion

Video S8: <https://youtu.be/OSSneR35R5k>

*Dactylochlamys pisciformis* VB2A methanogens, autofluorescence *in vivo*

Video S9: <https://youtu.be/Miz5gUKeLNs>

*Dactylochlamys* sp. MOKOTP1Q *in vivo*
