# Supplementary material for: Rediscovery of Remarkably Rare Anaerobic Tentaculiferous Ciliate Genera Legendrea and Dactylochlamys (Ciliophora: Litostomatea)
Source: Biology (Basel). 2023 May 12;12(5):707. doi: 10.3390/biology12050707 (PMC10215414; doi:10.3390/biology12050707)
Supplement: Supplementary file 1 [file biology-12-00707-s001.zip]

Archive with 8 entries (8 files):
- LIST OF SUPPLEMENTARY VIDEO LINKS.pdf
- Supplementary Figure S1.tif
- Supplementary Figure S2.tif
- Supplementary Table S1. Dactylochlamys pisciformis - morphometrics.pdf
- Supplementary Table S2. Legendrea pespelicani - morphometrics.pdf
- Supplementary Table S3. Legendrea ornata - morphometrics.pdf
- Supplementary Table S4 Illumina consensus sequences of putative prokaryotic symbionts.pdf
- Supplemetary Figure S1-2 legends.pdf
